# Supplementary material
Source: PubMed Central journal article supplement (PMC2276373)
Supplement: jbc_M709904200_2.pdf [file jbc_M709904200_2.pdf]

**Supplemental Table 1:** Fold reduction in relative affinity for r/hCRF and rUcn 1 as a result of alanine substitution of the indicated amino acids of human CRF-BP.

| mutant      | r/hCRF                              |                          | rUcn 1                              |                          |
|-------------|-------------------------------------|--------------------------|-------------------------------------|--------------------------|
|             | fold reduction in relative affinity | 95% confidence intervals | fold reduction in relative affinity | 95% confidence intervals |
| WT          | 1.00                                | (0.849 to 1.18)          | 1.00                                | (0.765 to 1.31)          |
| E27A        | 0.906                               | (0.718 to 1.14)          | 0.499                               | (0.415 to 0.601)         |
| E30A        | 1.23                                | (0.974 to 1.55)          | 1.09                                | (0.903 to 1.31)          |
| D33A        | 0.711                               | (0.564 to 0.897)         | 0.786                               | (0.652 to 0.946)         |
| D35A        | 0.926                               | (0.734 to 1.17)          | 0.955                               | (0.793 to 1.15)          |
| K45A        | 0.667 <sup>1)</sup>                 | (0.561 to 0.793)         | 0.946                               | (0.806 to 1.11)          |
| R46A        | 1.08                                | (0.912 to 1.29)          | 1.07                                | (0.908 to 1.25)          |
| E47A        | 1.26                                | (1.06 to 1.50)           | 0.883                               | (0.752 to 1.04)          |
| L48A        | 0.986                               | (0.860 to 1.13)          | 1.06                                | (0.930 to 1.20)          |
| E51A        | 0.830                               | (0.692 to 0.994)         | 0.568                               | (0.472 to 0.682)         |
| Y54A        | 3.94                                | (3.32 to 4.68)           | 1.12                                | (0.953 to 1.31)          |
| R55A        | 1.58                                | (1.33 to 1.88)           | 1.28                                | (1.09 to 1.50)           |
| R56A        | 133                                 | (123 to 145)             | 2.05                                | (1.87 to 2.25)           |
| L58A        | 3.39                                | (2.84 to 4.04)           | 1.76                                | (1.41 to 2.20)           |
| R59A        | 1.75                                | (1.47 to 2.09)           | 1.01                                | (0.860 to 1.19)          |
| L61A        | 6.69                                | (5.58 to 8.02)           | 22.0                                | (18.2 to 26.7)           |
| D62A        | 95.7                                | (85.1 to 107)            | 1.44                                | (1.20 to 1.72)           |
| M63A        | 1.11                                | (0.967 to 1.27)          | 7.76                                | (6.53 to 9.21)           |
| L64A        | 2.33                                | (2.03 to 2.67)           | 1.13                                | (0.951 to 1.34)          |
| F70A        | 6.45                                | (5.59 to 7.45)           | 1.35                                | (1.20 to 1.52)           |
| F72A        | no expression                       |                          | no expression                       |                          |
| D75A        | 1.52                                | (1.32 to 1.74)           | 1.50                                | (1.26 to 1.78)           |
| R76A        | 0.976                               | (0.814 to 1.17)          | 0.765                               | (0.637 to 0.92)          |
| Q78A        | 1.60                                | (1.39 to 1.83)           | 1.62                                | (1.37 to 1.93)           |
| F84A        | 1.79                                | (1.56 to 2.05)           | 33.9                                | (28.5 to 40.3)           |
| F85A        | 3.11                                | (2.70 to 3.58)           | 4.08                                | (3.63 to 4.59)           |
| E88A        | 1.33                                | (1.16 to 1.54)           | 2.34                                | (2.09 to 2.64)           |
| E90A        | 0.878                               | (0.762 to 1.01)          | 1.11                                | (0.984 to 1.24)          |
| E91A        | 1.14                                | (1.01 to 1.29)           | 2.28                                | (2.04 to 2.54)           |
| Y97A        | 1.10                                | (0.958 to 1.27)          | 0.918                               | (0.817 to 1.03)          |
| D98A        | no expression                       |                          | no expression                       |                          |
| D103A       | 1.10                                | (0.957 to 1.26)          | 1.22                                | (1.03 to 1.45)           |
| D108A       | 0.783                               | (0.678 to 0.903)         | 0.744                               | (0.626 to 0.884)         |
| F109A       | 1.28                                | (1.11 to 1.47)           | 1.15                                | (1.02 to 1.29)           |
| K111A       | 1.84                                | (1.64 to 2.06)           | 1.75                                | (1.57 to 1.96)           |
| F113A       | no expression                       |                          | no expression                       |                          |
| D114A       | no expression                       |                          | no expression                       |                          |
| W116A       | no detectable binding               |                          | no detectable binding               |                          |
| K119A       | 1.17                                | (1.05 to 1.31)           | 1.12                                | (1.00 to 1.25)           |
| E121A       | 3.88                                | (3.46 to 4.34)           | 5.92                                | (5.29 to 6.63)           |
| K122A       | 0.806                               | (0.719 to 0.903)         | 1.07                                | (0.958 to 1.20)          |
| F123A       | 5.19                                | (4.51 to 5.98)           | 5.66                                | (5.03 to 6.36)           |
| S125A       | 1.91                                | (1.66 to 2.20)           | 1.51                                | (1.34 to 1.70)           |
| D128A       | 1.83                                | (1.60 to 2.10)           | 2.52                                | (2.12 to 3.00)           |
| H129A       | 1.41                                | (1.23 to 1.61)           | 1.55                                | (1.30 to 1.84)           |
| R136A       | 1.72                                | (1.49 to 1.98)           | 1.35                                | (1.02 to 1.51)           |
| Y137A       | 1.59                                | (1.38 to 1.83)           | 1.05                                | (0.938 to 1.19)          |
| D139A       | 1.04                                | (0.901 to 1.19)          | 0.856                               | (0.762 to 1.04)          |
| E142A       | 0.737                               | (0.615 to 0.883)         | 0.758                               | (0.631 to 1.10)          |
| R147A       | 0.876                               | (0.731 to 1.05)          | 0.733                               | (0.610 to 0.882)         |
| R148A       | 1.31                                | (1.10 to 1.57)           | 0.989                               | (0.823 to 1.19)          |
| R151A       | 1.28                                | (1.13 to 1.45)           | 1.14                                | (1.01 to 1.30)           |
| S152A       | 1.40                                | (1.24 to 1.59)           | 1.31                                | (1.15 to 1.49)           |
| S153A       | 1.09                                | (0.960 to 1.23)          | 0.818                               | (0.719 to 0.931)         |
| Q154A       | 1.82                                | (1.61 to 2.06)           | 2.02                                | (1.77 to 2.30)           |
| N155A       | no expression                       |                          | no expression                       |                          |
| F160A       | 1.46                                | (1.33 to 1.61)           | 1.29                                | (1.15 to 1.44)           |
| F161A       | no expression                       |                          | no expression                       |                          |
| R162A       | 1.49                                | (1.31 to 1.69)           | 1.20                                | (1.05 to 1.36)           |
| F170A       | no expression                       |                          | no expression                       |                          |
| K175A       | 1.75                                | (1.52 to 2.02)           | 1.58                                | (1.41 to 1.78)           |
| N179A       | 1.56                                | (1.35 to 1.80)           | 1.61                                | (1.43 to 1.81)           |
| P182A       | 0.766                               | (0.695 to 0.845)         | 0.836                               | (0.746 to 0.936)         |
| N184A       | no expression                       |                          | no expression                       |                          |
| I186A       | 1.02                                | (0.899 to 1.15)          | 1.46                                | (1.28 to 1.67)           |
| S187A       | 1.57                                | (1.39 to 1.78)           | 1.88                                | (1.65 to 2.14)           |
| Q188A       | 2.44                                | (2.21 to 2.70)           | 8.03                                | (7.16 to 8.99)           |
| T189A       | 3.52                                | (3.05 to 4.05)           | 5.17                                | (4.60 to 5.81)           |
| F194A       | 1.04                                | (0.922 to 1.17)          | 1.15                                | (1.03 to 1.28)           |
| T195A       | 1.30                                | (1.15 to 1.47)           | 1.22                                | (1.07 to 1.38)           |
| Q201A       | 0.815                               | (0.723 to 0.920)         | 0.972                               | (0.873 to 1.08)          |
| H202A       | 0.801                               | (0.710 to 0.904)         | 0.807                               | (0.725 to 0.899)         |
| N204A       | 1.28                                | (1.11 to 1.47)           | 1.02                                | (0.908 to 1.15)          |
| F207A       | 2.23                                | (1.97 to 2.53)           | 2.54                                | (2.23 to 2.89)           |
| Y211A       | no detectable binding               |                          | no detectable binding               |                          |
| R203A       | 1.24                                | (0.926 to 1.67)          | 0.978                               | (0.744 to 1.29)          |
| D219A       | 1.61                                | (1.20 to 2.16)           | 1.64                                | (1.26 to 2.14)           |
| R46A/R59A   | 1.17                                | (0.985 to 1.39)          | 0.627                               | (0.534 to 0.736)         |
| C237A/C264A | 1.22                                | (1.03 to 1.45)           | 1.05                                | (0.894 to 1.23)          |
| C277A/C318A | 1.04                                | (0.923 to 1.16)          | 0.927                               | (0.829 to 1.04)          |

<sup>1)</sup> statistically significant differences in the relative potency of CRF or Ucn1 compared to WT CRF-BP are highlighted in grey. Larger shifts in potency are indicated by progressively darker shades of grey.
